# Supplementary material for: Tuning the binding energy of excitons in the MoS2 monolayer by molecular functionalization and defective engineering
Source: Royal Society of Chemistry journal article supplement (doi:10.1039/d0cp01239d), 2020-01-01
Supplement: d0cp01239d1.pdf [file d0cp01239d1.pdf]

Supporting Information (SI)

## Tuning the Binding Energy of Excitons in Monolayer MoS<sub>2</sub> by Molecular Functionalization and Defective Engineering

Kangli Wang<sup>1\*</sup> and Beate Paulus<sup>1</sup>

<sup>1</sup> *Institut für Chemie und Biochemie, Freie Universität Berlin, 14195 Berlin, Germany*

E-mail: klwang0329@zedat.fu-berlin.de

Fig. S1: The  $G_0W_0$  band edges of pristine MoS<sub>2</sub> with 55 eV  $G_0W_0$  self-energy as a function of vacuum thickness. Black dashed lines indicate the band edges of the MoS<sub>2</sub> with  $30 \times 30 \times 1$  k-point sampling and 15 Å vacuum thickness; CBM and VBM indicate the conduction band minimum and valence band maximum, respectively.

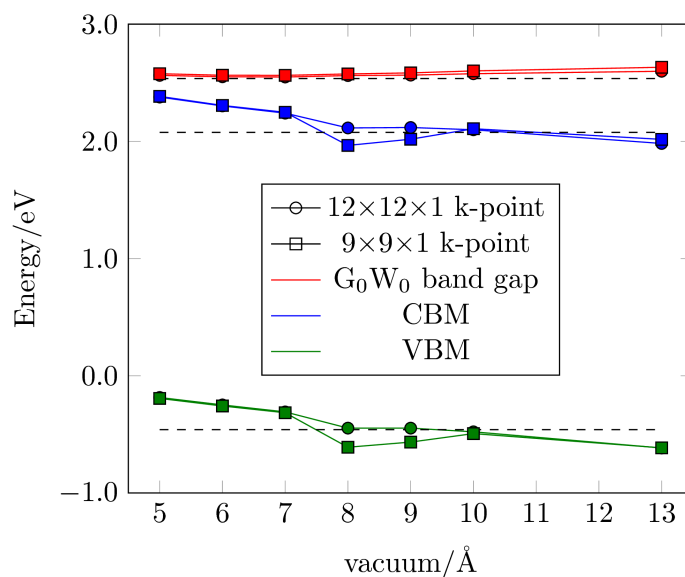

Table S1: The  $G_0W_0$  band gaps of pristine MoS<sub>2</sub> with 55 eV  $G_0W_0$  self-energy, 10 Å vacuum and  $12 \times 12 \times 1$  k-point sampling as a function of plane wave (PW) cutoff energy. CBM and VBM indicate the conduction band minimum and valence band maximum, respectively. Energies are in eV.

|                   | PW=500 | PW=600 | PW=700 | PW=800 |
|-------------------|--------|--------|--------|--------|
| CBM               | 3.323  | 3.322  | 3.321  | 3.321  |
| VBM               | 0.746  | 0.745  | 0.745  | 0.744  |
| $G_0W_0$ band gap | 2.577  | 2.577  | 2.576  | 2.577  |

Fig. S2: Electronic band structures and density of states for defective MoS<sub>2</sub>.

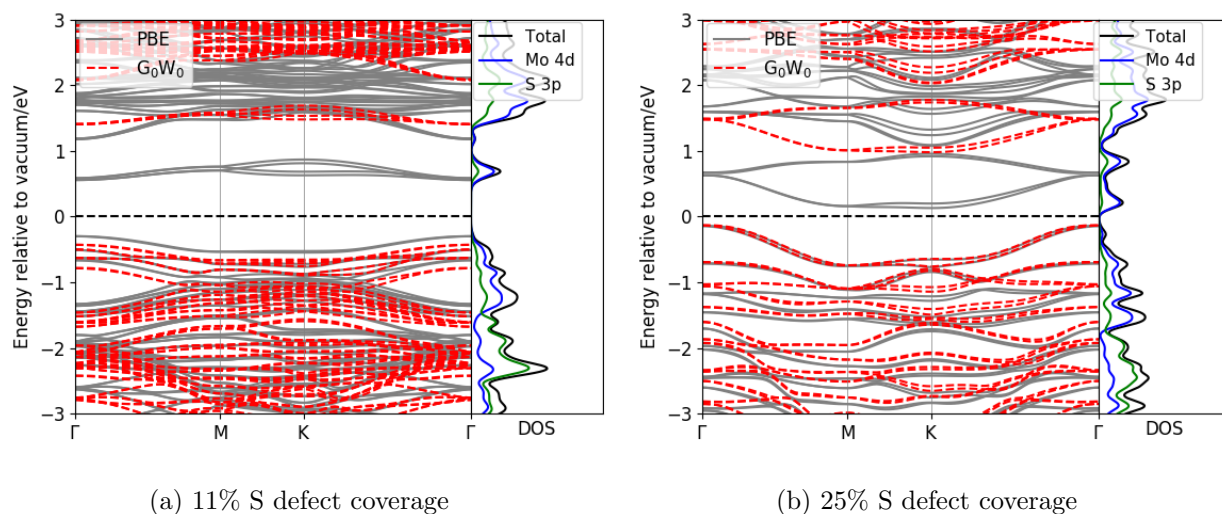

Fig. S3: The most favorable configurations for (a) NO and (b) C<sub>3</sub>H<sub>3</sub>N<sub>3</sub> molecules on pristine MoS<sub>2</sub> with 25% molecular coverage.

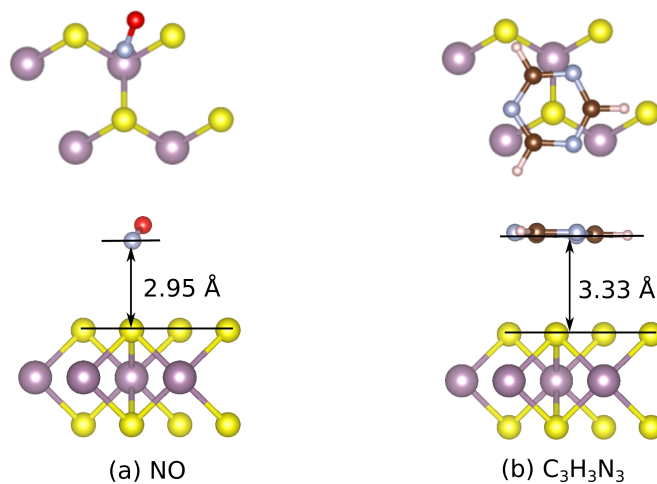

Fig. S4: The most favorable configurations for (a) NO and (b) C<sub>3</sub>H<sub>3</sub>N<sub>3</sub> molecules on defective MoS<sub>2</sub> with 25% molecular and defective coverage.

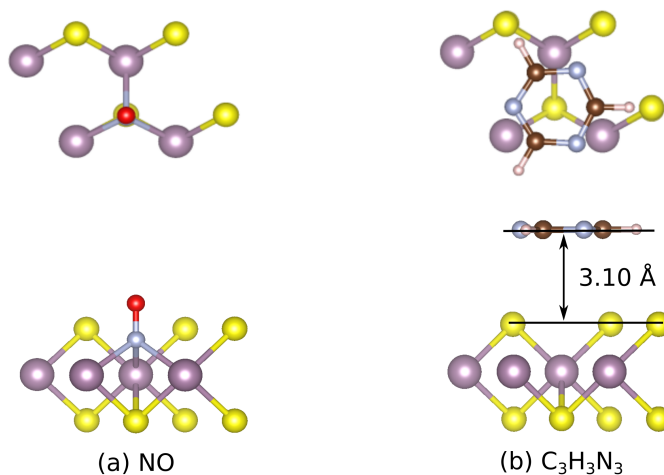

Fig. S5: Electronic band structures and density of states for the NO molecule adsorbed on pristine MoS<sub>2</sub> with (a) 11% and (b) 25% molecular coverage.

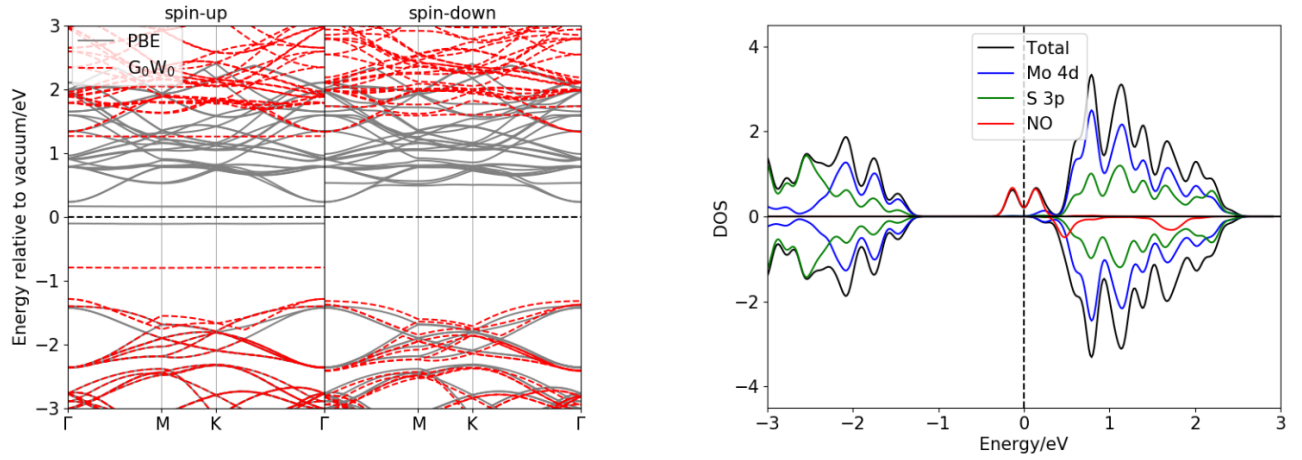

(a) 11% NO coverage

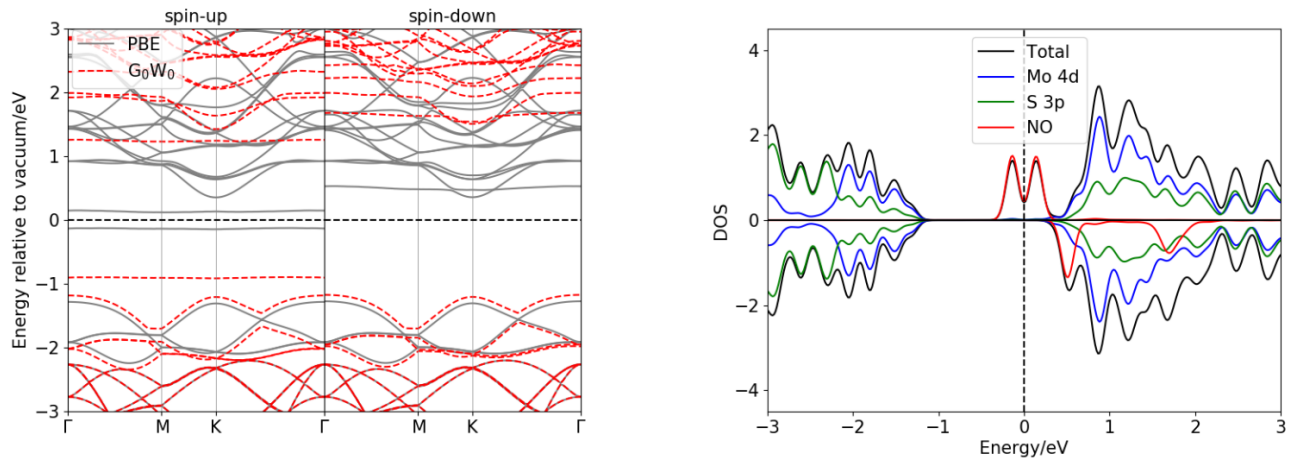

(b) 25% NO coverage

Fig. S6: Electronic band structures and density of states for the  $C_3H_3N_3$  molecule on pristine  $MoS_2$  with (a) 11% and (b) 25% molecular coverage.

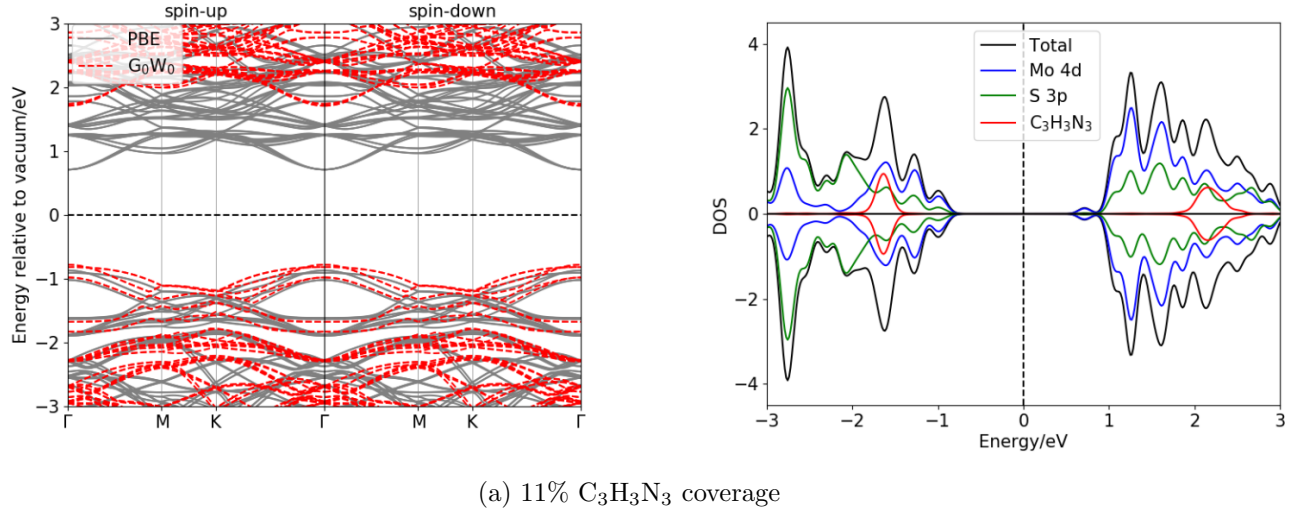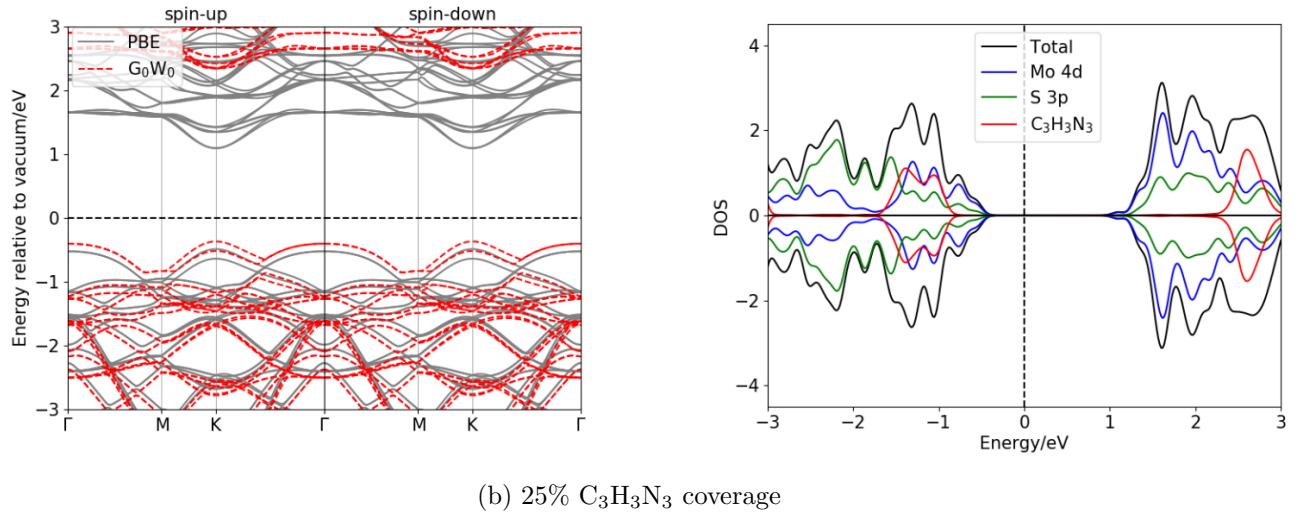

Table S2: The DFT band gaps with PBE functional for NO and  $C_3H_3N_3$  molecules adsorbed on pristine  $MoS_2$  with 11% and 25% molecular coverage. Energies are in eV.

|              | free | NO              |                 | $C_3H_3N_3$ |      |
|--------------|------|-----------------|-----------------|-------------|------|
|              |      | 11%             | 25%             | 11%         | 25%  |
| DFT band gap | 1.58 | 0.27(↑)/1.63(↓) | 0.28(↑)/1.66(↓) | 1.58        | 1.58 |

Fig. S7: Electronic band structures and density of states for the NO molecule on defective MoS<sub>2</sub> with (a) 11% and (b) 25% molecular and defective coverage.

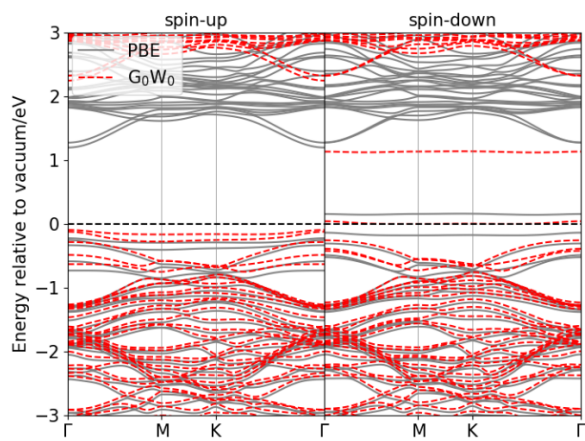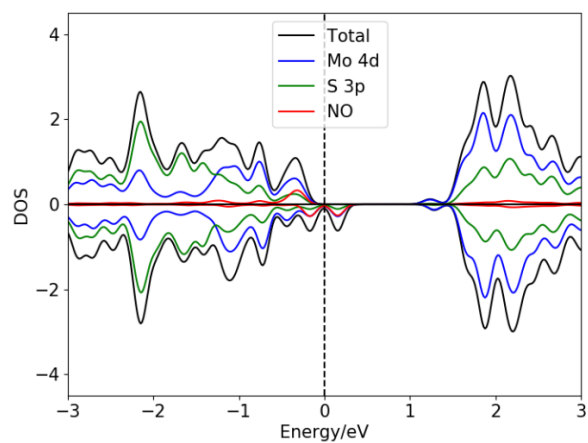

(a) 11% NO and S defect coverage

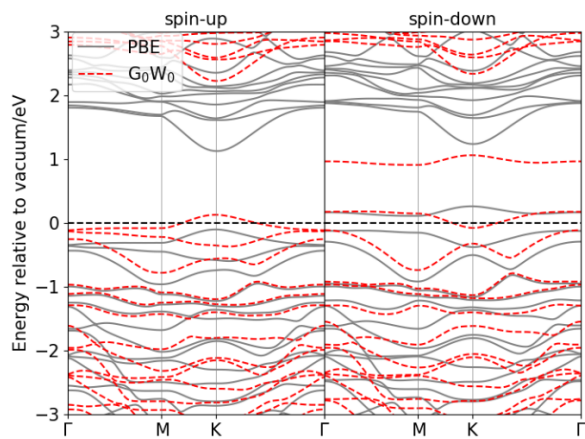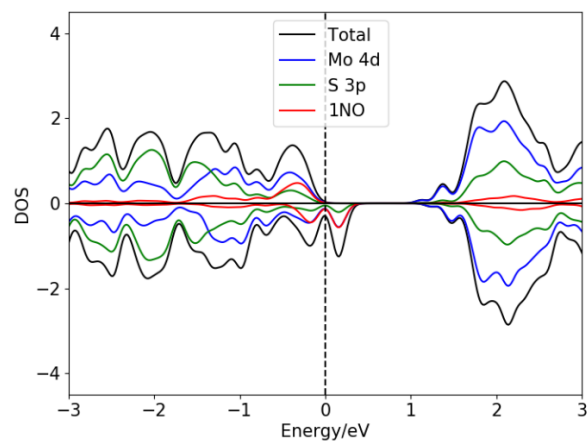

(b) 25% NO and S defect coverage

Fig. S8: Electronic band structures and density of states for the  $C_3H_3N_3$  molecule on defective  $MoS_2$  with (a) 11% and (b) 25% molecular and defective coverage.

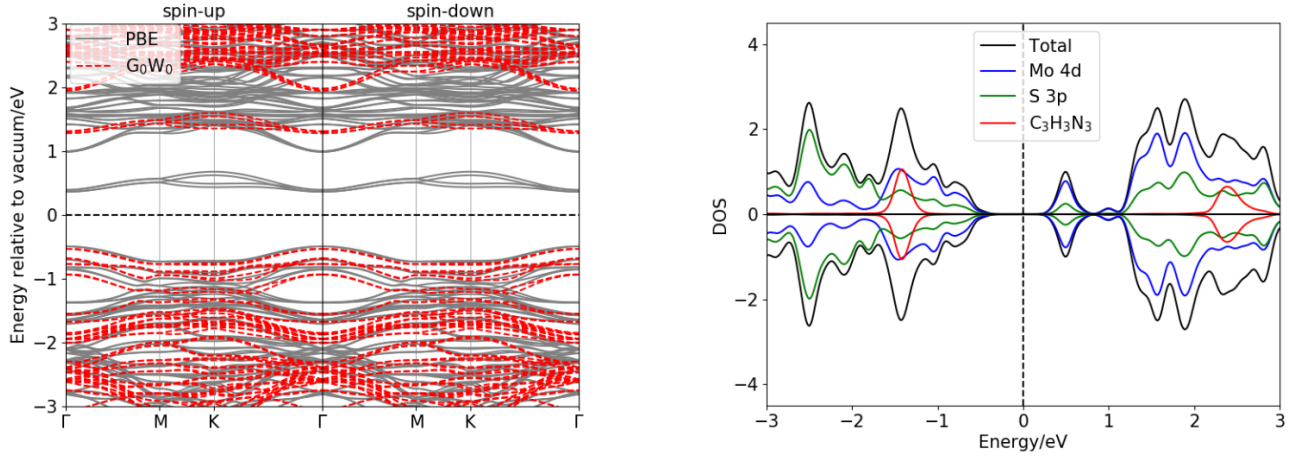

(a) 11%  $C_3H_3N_3$  and S defect coverage

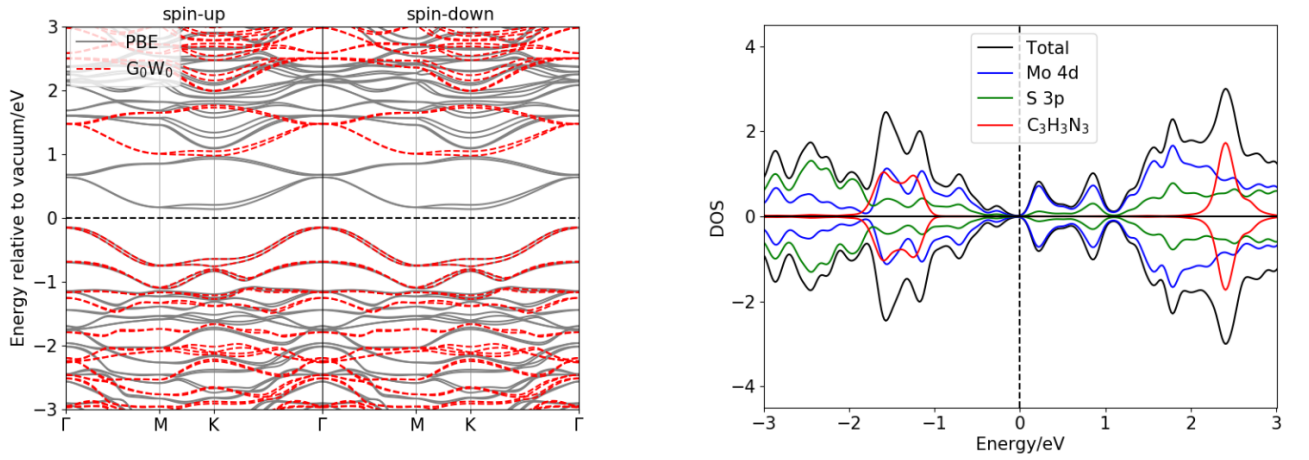

(b) 25%  $C_3H_3N_3$  and S defect coverage

Table S3: The DFT band gaps with PBE functional for NO and  $C_3H_3N_3$  molecules adsorbed on defective  $MoS_2$  monolayer with 11% and 25% molecular and defective coverage. Energies are in eV.

|              | S-defect (no molecule) |      | NO              |                 | $C_3H_3N_3$ |      |
|--------------|------------------------|------|-----------------|-----------------|-------------|------|
|              | 11%                    | 25%  | 11%             | 25%             | 11%         | 25%  |
| DFT band gap | 0.86                   | 0.28 | 1.42(↑)/0.29(↓) | 1.23(↑)/0.29(↓) | 0.86        | 0.29 |
